# Supplementary material
Source: Springer Nature journal article supplement (https://www.springermedizin.de/resource/supplementary/12889_2011_3539_MOESM1_ESM.pdf/9489270)
Supplement: MOESM1 [file 9489270]

## Summary Table of Take Care New York Indicators Status and Goals

| TCNY Agenda Item                                       | Indicator                                                                                                                | Status: 2002                                                                     | Status: 2003                                                                        |
|--------------------------------------------------------|--------------------------------------------------------------------------------------------------------------------------|----------------------------------------------------------------------------------|-------------------------------------------------------------------------------------|
| 1. Have a Regular Doctor or Other Health Care Provider | Adult New Yorkers without a regular doctor                                                                               | 1.6 million adults (25%)                                                         | 1.5 million adults (24%)*<br>85,000 additional New Yorkers reported having a doctor |
| 2. Be Tobacco Free                                     | Adult New Yorkers who smoke                                                                                              | 1.3 million adults (22%)                                                         | 1.17 million adults (19%).                                                          |
| 3. Have a Healthy Heart                                | Proportion of New Yorkers with high blood pressure and cholesterol.                                                      | **                                                                               | **                                                                                  |
|                                                        | Proportion of New Yorkers with well-controlled hypertension, cholesterol & diabetes                                      | **                                                                               | **                                                                                  |
| 4. Know Your HIV Status                                | Number of New Yorkers who die from HIV/AIDS                                                                              | 1,712 deaths                                                                     | 1656 (56 fewer deaths than 2002)                                                    |
| 5. Get Help for Depression                             | Prevalence of untreated depression                                                                                       | **                                                                               | **                                                                                  |
| 6. Live Free of Alcohol or Drugs                       | Alcohol-attributable mortality                                                                                           | 1,551 deaths                                                                     | 1514 deaths (37 fewer deaths)                                                       |
|                                                        | Drug-related deaths                                                                                                      | 905 deaths                                                                       | 960 deaths                                                                          |
| 7. Get Checked for Cancer                              | Screening rates for breast cancer                                                                                        | 77% of women aged 40+ have received mammograms in past 2 yrs (1.3 million women) | Survey data not available for 2003                                                  |
|                                                        | Screening rates for cervical cancer                                                                                      | 80% of women have received a pap smear in the past 3 years (2.2 million women)   | Survey data not available for 2003                                                  |
|                                                        | Screening rates for colon cancer                                                                                         | Data not available                                                               | 42% of New Yorkers age 50 and over (41.7%) had a colonoscopy in the last 10 years   |
| 8. Get the Immunizations You Need                      | Influenza immunizations among New Yorkers age 65+                                                                        | 63% of New Yorkers age 65 and over received a flu shot (590,000*)                | 63% of New Yorkers age 65 and over received a flu shot (590,000*)                   |
| 9. Make Your Home Safe & Healthy                       | Women who die from intimate partner homicide                                                                             | 2000-2002: 3-yr average rate of 1.0 per 100,000 women age 12+ in NYC             | 2001-2003: 3-yr average rate of 1.0 per 100,000 women age 12+ in NYC*               |
|                                                        | Children with newly-identified blood lead levels (BLL) $\geq 15\mu\text{g/dL}$ and an identified lead-based paint hazard | ~740 children under 6 yrs                                                        | ~680 children under 6 (8% decrease)                                                 |
| 10. Have a Healthy Baby                                | Infant mortality rate per 1,000 live births                                                                              | 6.0 per 1,000 live births                                                        | 6.5 per 1,000 live births (8% increase)                                             |

\* Revised Estimate: Changes in flu population numbers were calculated by applying the prevalence estimates to the total NYC population of adults 65 and older.

\*\* Baseline data for these indicators comes from the NYC Health and Nutrition examination survey. This data will be made available by the end of 2006.

\*\*\* Preliminary number of deaths only, these numbers are expected to change upon finalization of 2005 mortality files. Drug-related deaths in particular are subject to change based upon deaths pending Medical Examiner reports.
